# Supplementary material for: TRPM7 channel inhibition exacerbates pulmonary arterial hypertension through MEK/ERK pathway
Source: publisher site journal article supplement (doi:10.18632/aging.102036), 2019-06-19
Supplement: Supplementary file [file aging-v11i12-102036-supplementary-material-SD1.pdf]

**SUPPLEMENTARY FIGURES**

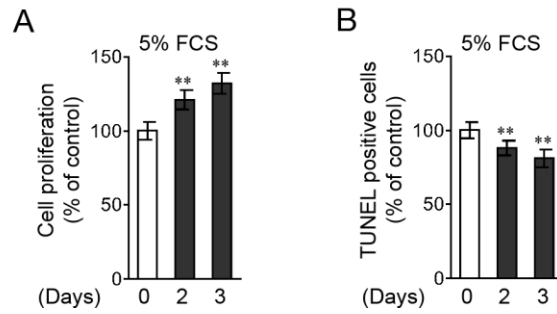

**Supplementary Figure 1. Increased proliferation and apoptosis resistance in PASMCS following 5% FCS stimulation.** Rat PASMCS were serum starved for 24 h, followed by incubation with medium alone (control) or containing 5% fetal calf serum (FCS) for 2 or 3 days. (A) The cell proliferation was determined by BrdU incorporation assay. (B) Cell apoptosis was detected by TUNEL staining. Results are expressed as a percentage relative to control. Data are mean ± SD. n = 3. One-way ANOVA test. \*\*, P < 0.01 compared to control.

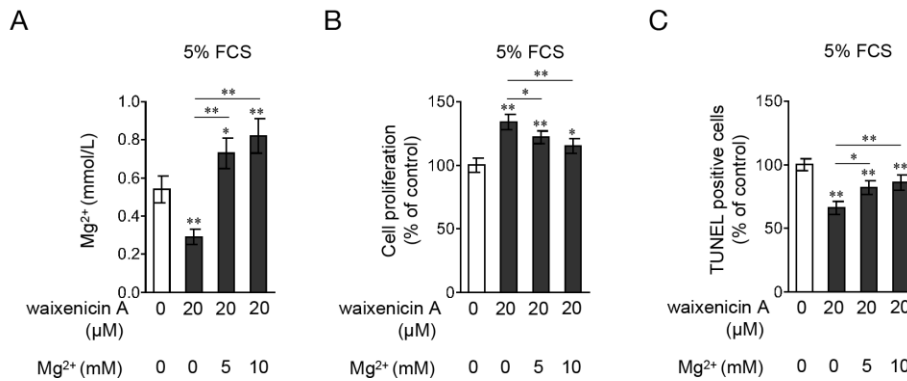

**Supplementary Figure 2. Mg<sup>2+</sup> anaplerosis largely rescues effects of TRPM7 inhibition on proliferation and apoptosis resistance in PASMCS.** Rat PASMCS were serum starved for 24 h, followed by incubation with medium containing 5% FCS for 24 h in the presence or absence of 20 μM waixenicin A, or 5 mM or 10 mM Mg<sup>2+</sup> as indicated. (A) Intracellular free Mg<sup>2+</sup> concentration was determined. Data are mean ± SD from 3 independent experiments. (B) The cell proliferation was determined by BrdU incorporation assay. (C) Cell apoptosis was detected by TUNEL staining. Results are expressed as a percentage relative to control. Data are mean ± SD. n = 3. One-way ANOVA test. \*\*, P < 0.01; \*, P < 0.05 compared to control.

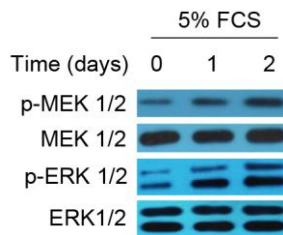

**Supplementary Figure 3. The MEK/ERK pathway is activated in PASMCS stimulated with 5% FCS.** Rat PASMCS were serum starved for 24 h, followed by incubation with medium alone (control) or containing 5% FCS for 1 or 2 days. The protein expression of p-MEK 1/2, MEK 1/2, p-ERK 1/2 and ERK 1/2 was determined by Western blot analysis. The representative images from 3 independent experiments are shown.
