# Supplementary material for: TRPM7 channel inhibition exacerbates pulmonary arterial hypertension through MEK/ERK pathway
Source: publisher site journal article supplement (doi:10.18632/aging.102036), 2019-06-19
Supplement: Supplementary file [file aging-v11i12-102036-supplementary-material-SD2.pdf]

## SUPPLEMENTARY TABLE

**Supplementary Table 1. Clinical characteristics of healthy donors and PAH patients.**

|                          | <b>Healthy controls (n = 6)</b> | <b>PAH patients (n = 8)</b> | <b>Significance</b> |
|--------------------------|---------------------------------|-----------------------------|---------------------|
| Age (years)              | 52 ± 11.3                       | 55 ± 14.5                   | NS                  |
| Male (%)                 | 50                              | 50                          | NS                  |
| BMI (kg/m <sup>2</sup> ) | 25.7 ± 3.9                      | 26.3 ± 4.2                  | NS                  |
| Smoking history (%)      | 25                              | 33                          | NS                  |
| mPAP (mmHg)              | –                               | 57 ± 17                     | –                   |
| PVR (Wood units)         | –                               | 7.9 ± 2.6                   | –                   |

Note: BMI, body mass index; mPAP, mean arterial pulmonary pressure; PVR, pulmonary vascular resistance; NS, not significant
